# Supplementary material for: Self-textured ZnO via AACVD of alkyl alkoxides: a solution-based seed-less route towards optoelectronic-grade coatings
Source: Royal Society of Chemistry journal article supplement (doi:10.1039/d3ma00468f), 2023-01-01
Supplement: d3ma00468f1.pdf [file d3ma00468f1.pdf]

## Self-textured ZnO *via* AACVD of alkyl alkoxides: A solution-based seed-less route towards optoelectronic-grade coatings.

### SUPPORTING INFORMATION

Clara Sanchez-Perez,<sup>1,2\*</sup> Sriluxmi Srimuruganathan,<sup>1</sup> Carlos Sotelo-Vazquez,<sup>3</sup> Sanjayan Sathashivam,<sup>1,4</sup> Mangyue Wang,<sup>1</sup> Javier Marugan,<sup>3</sup> Ivan P. Parkin,<sup>1</sup> Claire J. Carmalt.<sup>1\*</sup>

1. University College London, Department of Chemistry, 20 Gordon St, London WC1H 0AJ, UK.
2. Instituto de Energía Solar, Universidad Politécnica de Madrid, 28040 Madrid, Spain.
3. Department of Chemical and Environmental Technology (ESCET), Universidad Rey Juan Carlos, C/Tulipán s/n, Móstoles, 28933 Madrid, Spain.
4. School of Engineering, London South Bank University, London, SE1 0AA, UK

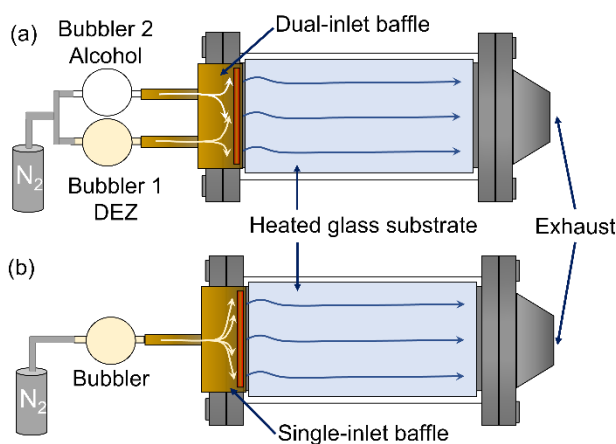

**Figure S1.** Schematic top-view representation of a (a) double-source and a (b) single-source AACVD configuration, both containing a blade element on the baffle to generate a laminar flow inside the reactor (blue arrows).

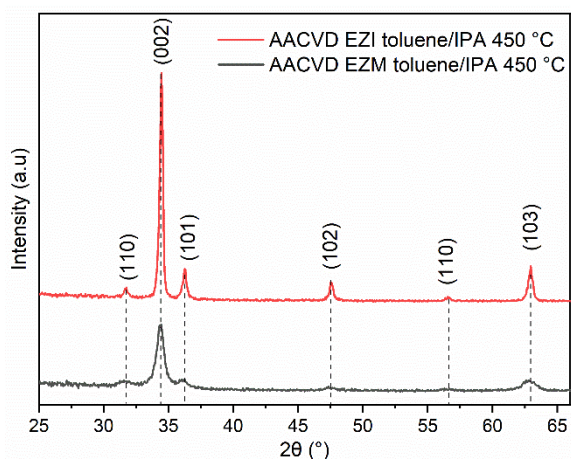

**Figure S2.** GIXRD patterns of ZnO thin films grown from EZI (top red) and EZI (bottom black) in toluene/isopropanol anhydrous solutions at 450 °C using a single-inlet AACVD configuration.

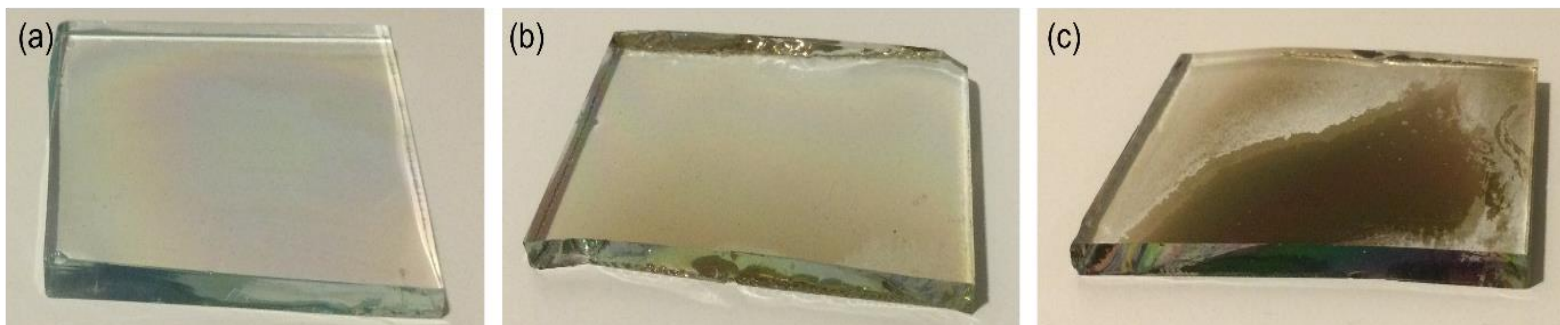

**Figure S3.** Picture of sections of ZnO thin film grown *via* AACVD of Zn(acac)<sub>2</sub> in MeOH at (a) 400 °C, (b) 450 °C and (c) 500 °C exhibiting increasing carbon contamination.

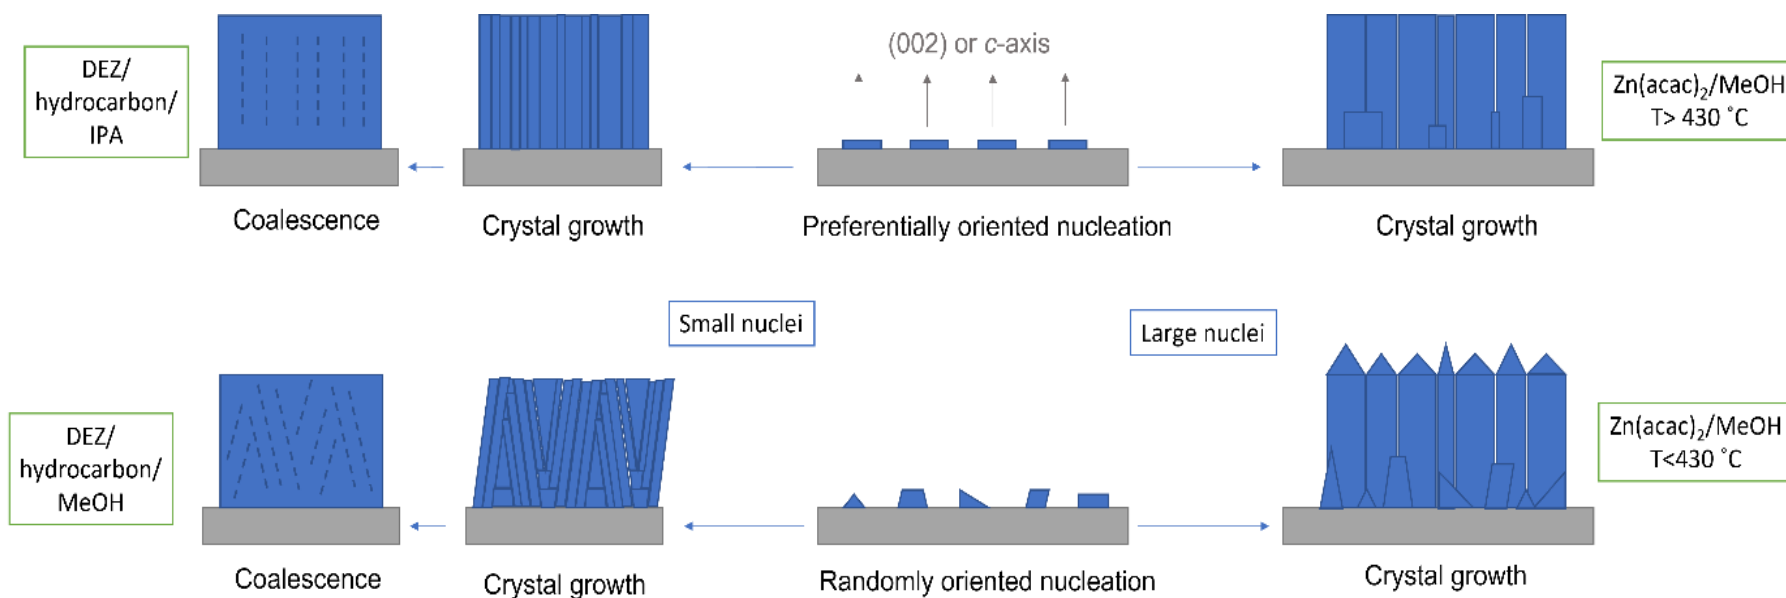

**Figure S4.** Schematic representation of nucleation, crystal growth and texture evolution during polycrystalline ZnO film deposition using AACVD of Zn(acac)<sub>2</sub> and DEZ solutions.

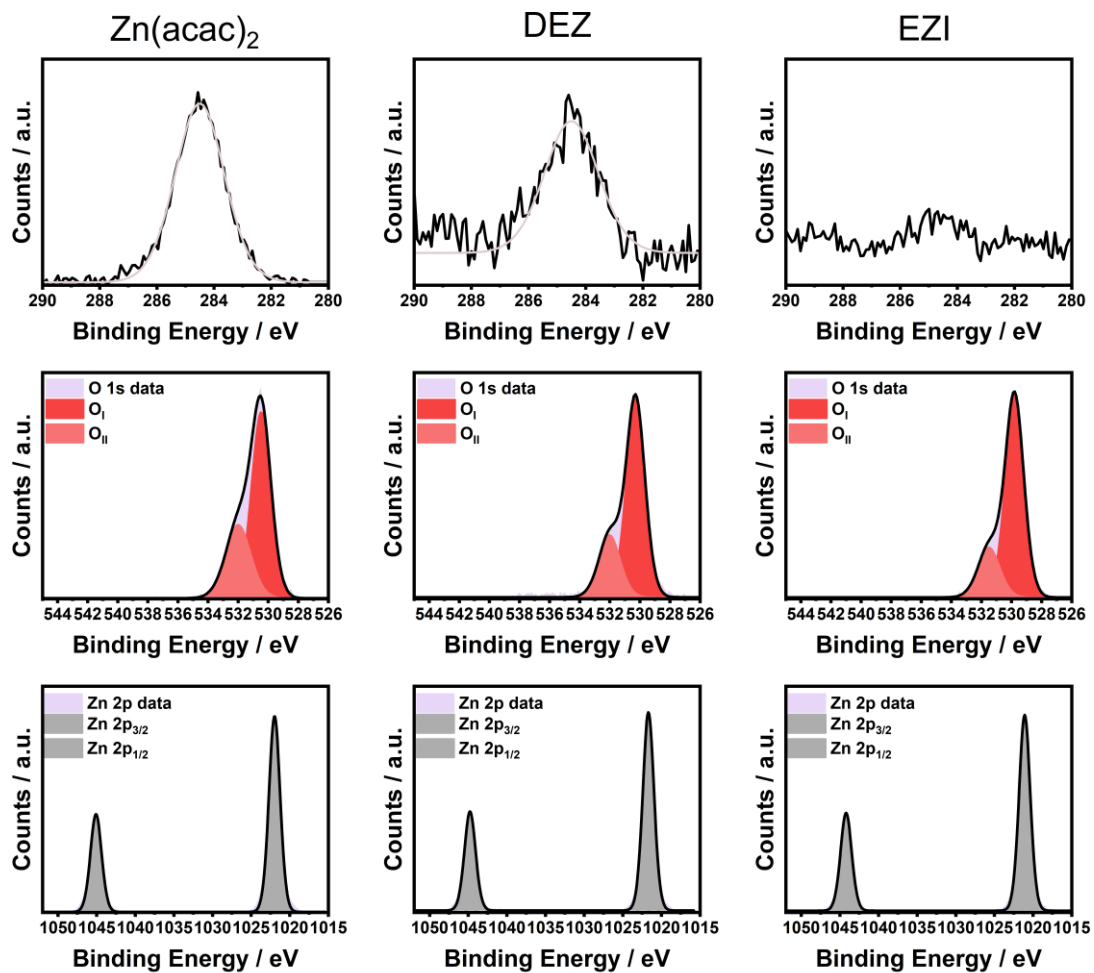

**Figure S5.** Schematic representation of nucleation, crystal growth and texture evolution during polycrystalline ZnO film deposition using AACVD of Zn(acac)<sub>2</sub> and DEZ solutions.
